# Supplementary material for: Impact of Cold Stress on Leaf Structure, Photosynthesis, and Metabolites in Camellia weiningensis and C. oleifera Seedlings
Source: MDPI journal article supplement (doi:10.3390/horticulturae8060494), 2022-06-02
Supplement: s1 [file s1]

## Supplemental information

### Impact of cold stress on leaf structure, photosynthesis, and metabolites in *Camellia weiningensis* and *C. oleifera* seedlings

**a**

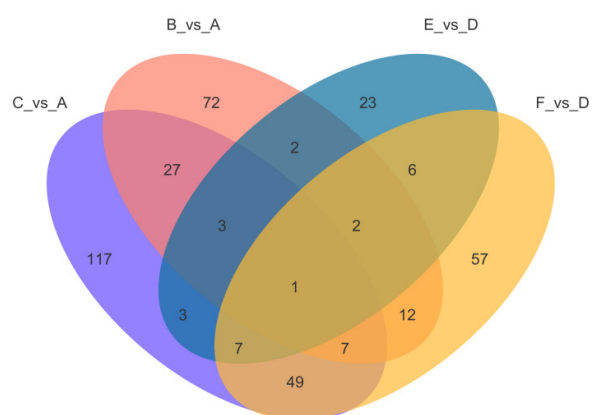

**b**

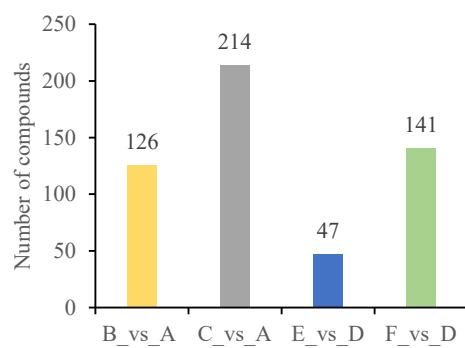

**Figure S1.** (a) Venn diagram showing all SCMs numbers among different comparison groups. (b) Number of SCMs in the B vs. A , C vs. A , E vs. D , F vs. D groups

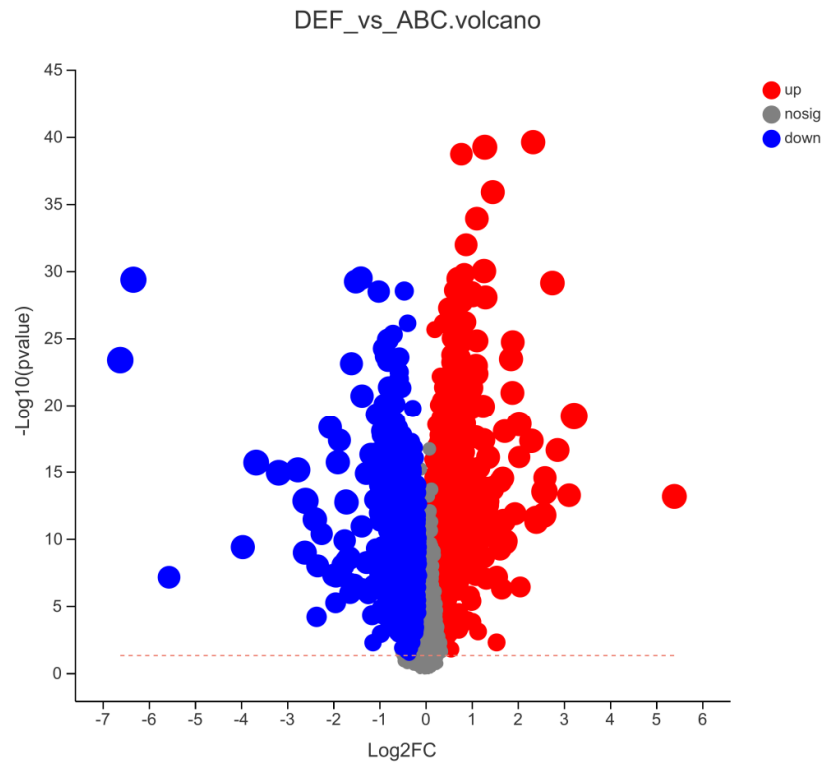

**Figure S2.** Volcano plot of SCMs between two *Camellia* species seedlings. The X-axis is expressed as  $\log_2$  (fold change). The Y-axis is expressed as  $-\log_{10}$  (P value). Gray indicates no significant difference in expression, red represents up-regulated SCMs, green represents down-regulated SCMs

Table S1 Two-way ANOVA analysis the effect of temperature and and species on leaf anatomical structure

| Variation           | Leaf thickness ( $\mu\text{m}$ ) | Thickness of upper epidermis ( $\mu\text{m}$ ) | Thickness of lower epidermis ( $\mu\text{m}$ ) | Thickness of palisade tissue ( $\mu\text{m}$ ) | Thickness of spongy tissue ( $\mu\text{m}$ ) | Palisade tissue-spongy tissue ratio | Tissue structure tightness (%) | Tissue structure looseness(%) |
|---------------------|----------------------------------|------------------------------------------------|------------------------------------------------|------------------------------------------------|----------------------------------------------|-------------------------------------|--------------------------------|-------------------------------|
| Temperature         | <0.001                           | 0.08                                           | 0.037                                          | <0.001                                         | 0.004                                        | <0.001                              | <0.001                         | <0.001                        |
| Species             | <0.001                           | 0.004                                          | <0.001                                         | 0.002                                          | <0.001                                       | <0.001                              | <0.001                         | <0.001                        |
| Temperature*Species | 0.034                            | <0.001                                         | <0.001                                         | 0.003                                          | 0.095                                        | 0.821                               | 0.678                          | 0.414                         |

P-values show that was not significant for  $P>0.05$  and significant  $P<0.05$

Table S2 Two-way ANOVA analysis the effect of temperature and and species on photosynthesis

| Variation           | Fv/Fm | Photosynthetic rate ( $\mu\text{mol}\cdot\text{CO}_2\cdot\text{m}^{-2}\cdot\text{s}^{-1}$ ) | Stomatal conductance ( $\text{mmol}\cdot\text{H}_2\text{O}\cdot\text{m}^{-2}\cdot\text{s}^{-1}$ ) | Transpiration rate ( $\text{mmol}\cdot\text{H}_2\text{O}\cdot\text{m}^{-2}\cdot\text{s}^{-1}$ ) | WUE ( $\mu\text{mol}\cdot\text{mmol}$ ) | Chlorophyll ( $\text{mg}\cdot\text{g}^{-1}$ ) |
|---------------------|-------|---------------------------------------------------------------------------------------------|---------------------------------------------------------------------------------------------------|-------------------------------------------------------------------------------------------------|-----------------------------------------|-----------------------------------------------|
| Temperature         | 0.03  | <0.001                                                                                      | <0.001                                                                                            | <0.001                                                                                          | <0.001                                  | <0.001                                        |
| Species             | 0.293 | 0.011                                                                                       | 0.051                                                                                             | 0.761                                                                                           | 0.006                                   | 0.146                                         |
| Temperature*Species | 0.349 | <0.001                                                                                      | 0.087                                                                                             | 0.532                                                                                           | <0.001                                  | 0.001                                         |

P-values show that was not significant for  $P>0.05$  and significant  $P<0.05$

Table S3 Two-way ANOVA analysis the effect of temperature and species on endogenous hormone contents

| Variation           | GA ( $\text{ng}\cdot\text{g}^{-1}$ ) | ABA ( $\text{ng}\cdot\text{g}^{-1}$ ) | JA ( $\text{ng}\cdot\text{g}^{-1}$ ) | IAA ( $\text{ng}\cdot\text{g}^{-1}$ ) |
|---------------------|--------------------------------------|---------------------------------------|--------------------------------------|---------------------------------------|
| Temperature         | <0.001                               | <0.001                                | <0.001                               | 0.038                                 |
| Species             | 0.008                                | 0.712                                 | <0.001                               | <0.001                                |
| Temperature*Species | <0.001                               | <0.001                                | <0.001                               | <0.001                                |

P-values show that was not significant for  $P>0.05$  and significant  $P<0.05$
